# Supplementary material
Source: publisher figshare collection journal article supplement (https://diabetesjournals.figshare.com/ndownloader/files/25492013)
Supplement: Supplementary file 1 [file 25492013]

| Subject | Pre-intervention |     |      |          | Intervention |     |      |          | Time Scan I-II (months) | Time on Pump+CGM (months) |
|---------|------------------|-----|------|----------|--------------|-----|------|----------|-------------------------|---------------------------|
|         | Education        | MDI | Pump | Pump+CGM | Education    | MDI | Pump | Pump+CGM |                         |                           |
| 1       |                  |     |      | •        | •            |     |      | •        | 4.9                     | 4.9                       |
| 2       | •                | •   |      |          |              |     |      | •        | 10.4                    | 2.1                       |
| 3       | •                |     | •    |          | •            |     |      | •        | 7.8                     | 7.3                       |
| 4       |                  |     | •    |          | •            |     |      | •        | 12.0*                   | 12.0                      |
| 5       |                  | •   |      |          | •            |     |      | •        | 11.7*                   | 3.4                       |
| 6       | •                | •   |      |          |              | •   |      |          | 9.2                     | -                         |
| 7       | •                | •   |      |          | •            |     |      | •        | 7.1                     | 4.4                       |
| 8       | •                |     | •    |          |              |     |      | •        | 2.8                     | 2.6                       |
| 9       | •                | •   |      |          |              | •   |      |          | 7.8                     | -                         |
| 10      | •                |     | •    |          |              |     |      | •        | 7.8                     | 6.8                       |
| 11      | •                | •   |      |          |              |     |      | •        | 8.7                     | 8.7                       |
| 12      | •                |     | •    |          |              |     |      | •        | 6.4                     | 5.3                       |

Supplementary Table 1 – Clinical intervention flow chart. Pre-intervention indicates diabetes management prior to study start. Intervention indicates clinical study protocol. Education indicates structured education designed for individuals with type 1 diabetes (T1D), DAFNE (Dose Adjustment for Normal Eating) or local equivalent. MDI = participants using multiple daily injections. Pump = participants using a continuous subcutaneous insulin infusion pump. Pump+CGM = Medtronic Minimed™ 640G insulin pump plus continuous glucose monitoring (CGM), Guardian™ 2 Link transmitters and Enlite™ glucose sensors. Black dot indicates participant received the intervention. Time Scan I-II indicates period between the pre-intervention scan and post-intervention scan, i.e. intervention duration. \* = participants studied at 12 months as they did not achieve 3 consecutive weeks of asymptomatic hypoglycemia <3.0 mmol/L (54mg/dL). Time on Pump+CGM indicates time spent on sensor augmented pump therapy during intervention.
